# Supplementary material for: Human telomerase is directly regulated by non-telomeric TRF2-G-quadruplex interaction
Source: PubMed Central journal article supplement — Cell Rep. Author manuscript; Available in PMC 2021 Jun 23. (PMC7611063; doi:10.1016/j.celrep.2021.109154), 2021-05-18
Supplement: EMS125577-supplement-Supplemental_Information.pdf [file EMS125577-supplement-Supplemental_Information.pdf]

**SUPPLEMENTAL INFORMATION**

Supplemental information can be found online at <https://doi.org/10.1016/j.celrep.2021.109154>.
